# Supplementary material for: Ratiometric luminescence sensing based on a mixed Ce/Eu metal–organic framework
Source: Royal Society of Chemistry journal article supplement (doi:10.1039/c7tc05309f), 2018-01-01
Supplement: c7tc05309f1.pdf [file c7tc05309f1.pdf]

## Electronic Supplementary Information (ESI)

### Ratiometric luminescent sensing for ascorbic acid based on mixed Ce/Eu metal-organic framework

Dan Yue, Yike Huang, Ling Zhang, Ke Jiang, Xin Zhang, Yuanjing Cui,\* Yu Yang, and Guodong Qian\*

State Key Laboratory of Silicon Materials, Cyrus Tang Center for Sensor Materials and Applications, School of Materials Science and Engineering, Zhejiang University, Hangzhou 310027, China.

E-mail: cuiyj@zju.edu.cn, gdqian@zju.edu.cn

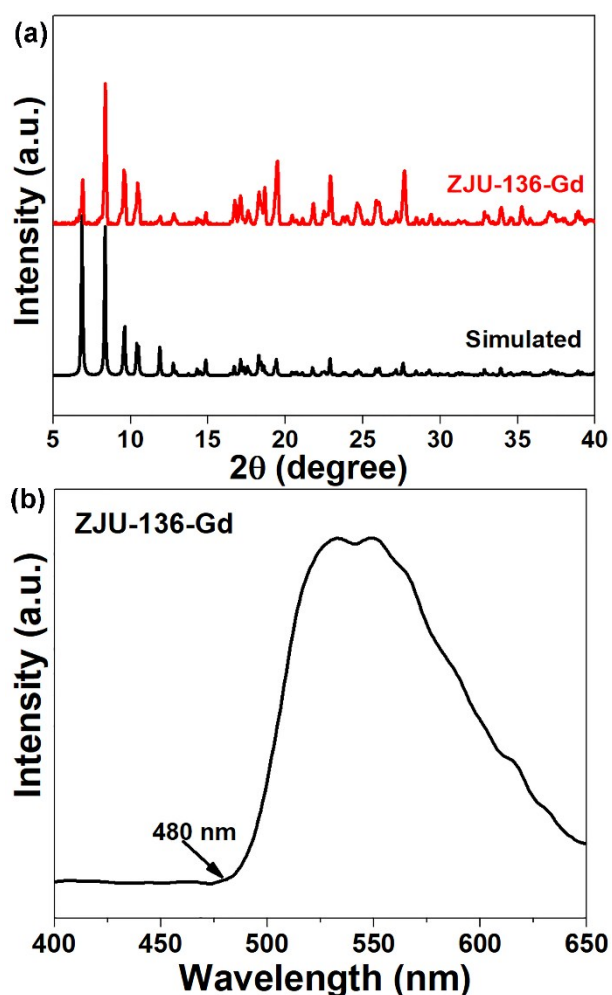

Fig. S1 (a) PXRD patterns of ZJU-136-Gd; (b) Phosphorescence spectra of ZJU-136-Gd at 77 K.

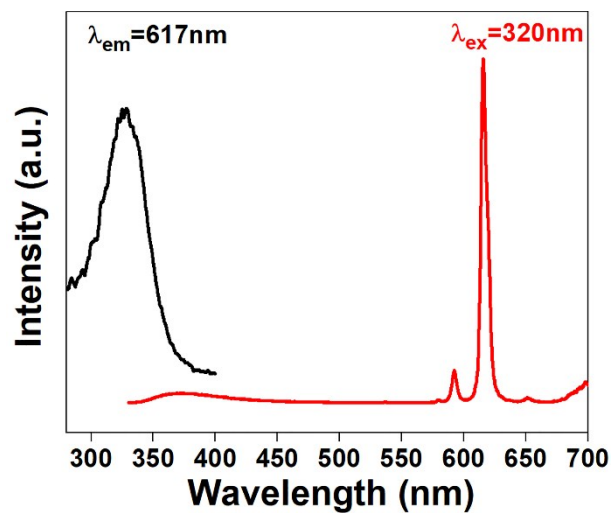

Fig. S2 The excitation (black line) and emission (red line) spectra of ZJU-136-Eu in aqueous solution.

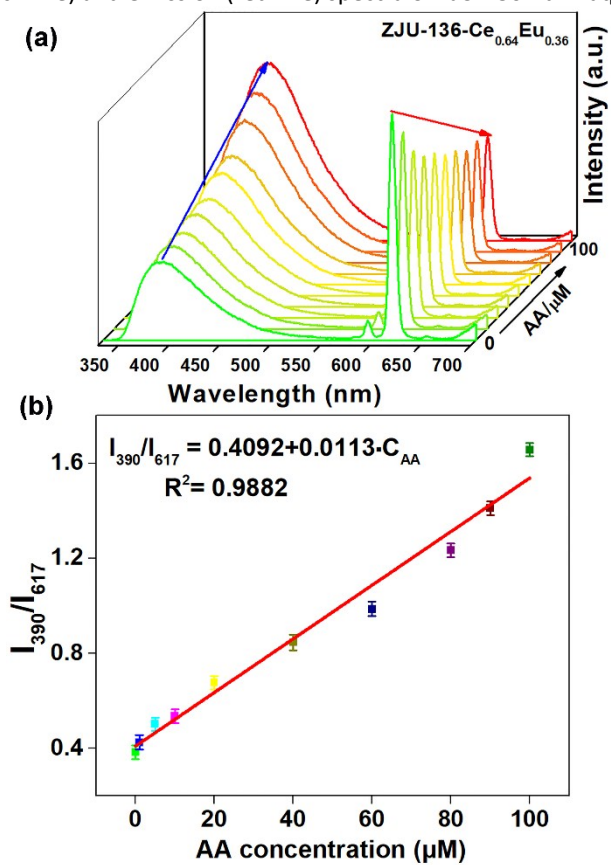

Fig. S3 (a, b) Fluorescence response and linear relationship of the normalized  $I_{390}$  and  $I_{617}$  of ZJU-136- $\text{Ce}_{0.64}\text{Eu}_{0.36}$  with the addition of different concentrations of AA (0-100  $\mu\text{M}$ ).

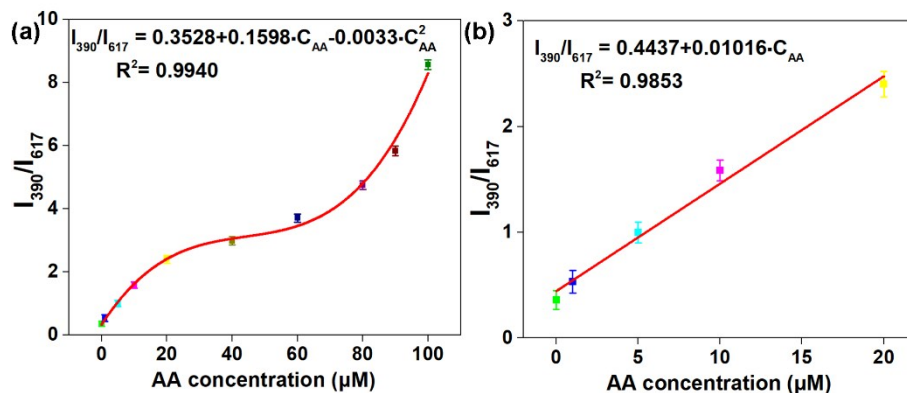

Fig. S4 Concentration dependence of the fluorescence intensity ratio ( $I_{390}/I_{617}$ ), the concentration (a) 0-100  $\mu\text{M}$  and (b) 0-20  $\mu\text{M}$ .

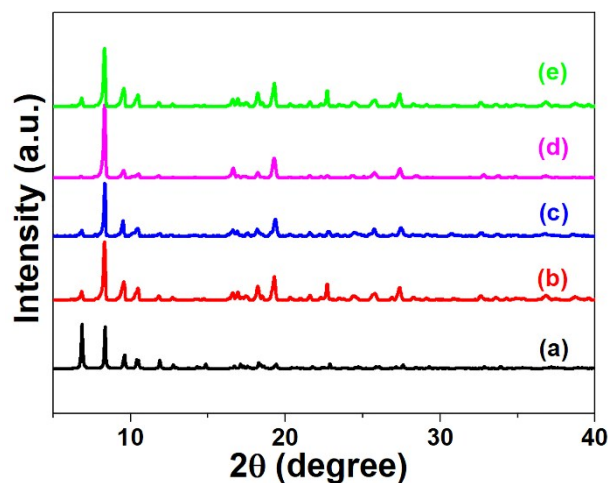

Fig. S5 PXRD patterns of (a) simulated; (b) ZJU-136- $\text{Ce}_{0.76}\text{Eu}_{0.24}$ ; (c) ZJU-136- $\text{Ce}_{0.76}\text{Eu}_{0.24}$  with addition of 100  $\mu\text{M}$  AA for 1 hour; (d) ZJU-136- $\text{Ce}_{0.64}\text{Eu}_{0.36}$ ; (e) ZJU-136- $\text{Ce}_{0.64}\text{Eu}_{0.36}$  in 100  $\mu\text{M}$  AA for 1 hour.

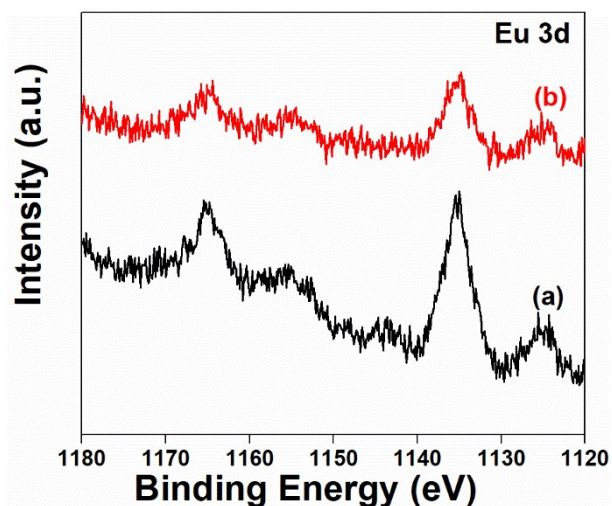

Fig. S6 XPS analysis of the Eu 3d peaks of (a) ZJU-136- $\text{Ce}_{0.76}\text{Eu}_{0.24}$ , (b) ZJU-136- $\text{Ce}_{0.76}\text{Eu}_{0.24}$  with addition of 100  $\mu\text{M}$  AA, respectively.

**Table S1.** The molar ratio of the starting Ce/Eu salt and that in the synthesized product calculated by ICP analysis.

| Sample                                        | The molar ratio of the starting Ce/Eu salt | The Ce/Eu ratios calculated by ICP analysis |
|-----------------------------------------------|--------------------------------------------|---------------------------------------------|
| ZJU-136-Ce <sub>0.76</sub> Eu <sub>0.24</sub> | 0.8:0.2                                    | 0.76:0.24                                   |
| ZJU-136-Ce <sub>0.64</sub> Eu <sub>0.36</sub> | 0.7:0.3                                    | 0.64:0.36                                   |

**Table S2** Analyzed peaks and corresponding binding energy, ion states and their initial states of ZJU-136-Ce<sub>0.76</sub>Eu<sub>0.24</sub> in the absence and presence of 100  $\mu$ M AA.

| Ce 3d region            | Peak assignment | Ce species       | ZJU-136-Ce <sub>0.76</sub> Eu <sub>0.24</sub> |          | ZJU-136-Ce <sub>0.76</sub> Eu <sub>0.24</sub> + 100 $\mu$ M AA |          |
|-------------------------|-----------------|------------------|-----------------------------------------------|----------|----------------------------------------------------------------|----------|
|                         |                 |                  | Peak (eV)                                     | Area (%) | Peak (eV)                                                      | Area (%) |
| <b>3d<sub>5/2</sub></b> | v <sub>0</sub>  | Ce <sup>3+</sup> | 881.18                                        | 5.38     | 881.25                                                         | 4.99     |
|                         | v               | Ce <sup>4+</sup> | 882.46                                        | 10.87    | 882.41                                                         | 10.18    |
|                         | v'              | Ce <sup>3+</sup> | 885.39                                        | 31.06    | 885.69                                                         | 33.35    |
|                         | v''             | Ce <sup>4+</sup> | 887.09                                        | 7.35     | 887.38                                                         | 5.70     |
| <b>3d<sub>3/2</sub></b> | v'''            | Ce <sup>4+</sup> | 896.78                                        | 0.91     | —                                                              | —        |
|                         | u <sub>0</sub>  | Ce <sup>3+</sup> | 899.10                                        | 6.69     | 898.60                                                         | 6.98     |
|                         | u               | Ce <sup>4+</sup> | 900.85                                        | 8.19     | 900.56                                                         | 10.46    |
|                         | u'              | Ce <sup>3+</sup> | 903.86                                        | 22.09    | 904.06                                                         | 24.24    |
|                         | u''             | Ce <sup>4+</sup> | 906.75                                        | 5.03     | 906.80                                                         | 4.10     |
|                         | u'''            | Ce <sup>4+</sup> | 917.05                                        | 2.26     | —                                                              | —        |
